# Supplementary material
Source: MDPI journal article supplement (https://www.mdpi.com/2072-4292/15/13/3416)
Supplement: s1 [file s1]

# Supplementary Materials for

## Appraisal of Magnetotelluric and Magnetovariational Transfer Functions Selection in 3-D Inversion

Hui Yu <sup>1,2</sup>, Bin Tang <sup>1,2</sup>, Juzhi Deng <sup>1,2,\*</sup>, Hui Chen <sup>1,2</sup>, Wenwu Tang <sup>1,2</sup>, Xiao Chen <sup>1,2</sup> and Cong Zhou <sup>1,2</sup>

<sup>1</sup> State Key Laboratory of Nuclear Resources and Environment, East China University of Technology, Nanchang 330013, China; yuhui\_geo@ecut.edu.cn (H.Y.); tangbin@ecut.edu.cn (B.T.); huich@ecut.edu.cn (H.C.); wwtang@ecut.edu.cn (W.T.); chenxiao@ecut.edu.cn (X.C.); czhou@ecut.edu.cn (C.Z.)

<sup>2</sup> Engineering Research Center for Seismic Disaster Prevention and Engineering Geological Disaster Detection of Jiangxi Province, East China University of Technology, Nanchang 330013, China

\* Correspondence: jzhdeng@ecut.edu.cn

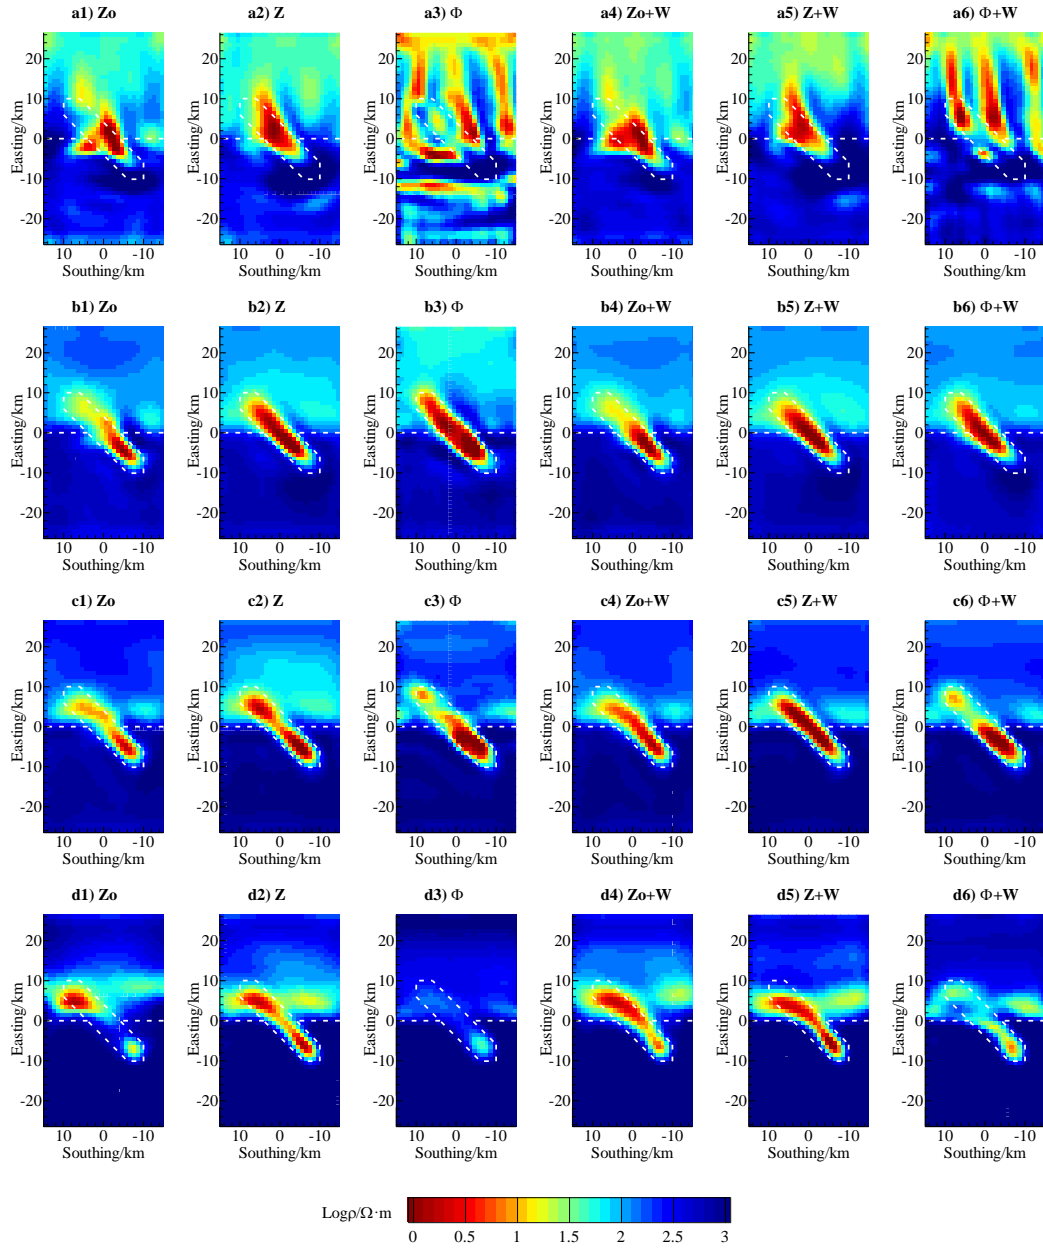

**Figure S1** Resistivity models obtained from inversion of different transfer functions data, displayed as horizontal slices at depth of 4km and across the array. Horizontal slices showing the results of the inversion processes with homogeneous half-space models of a) 10, b) 100, c) 300, and d) 1000  $\Omega\cdot\text{m}$ .

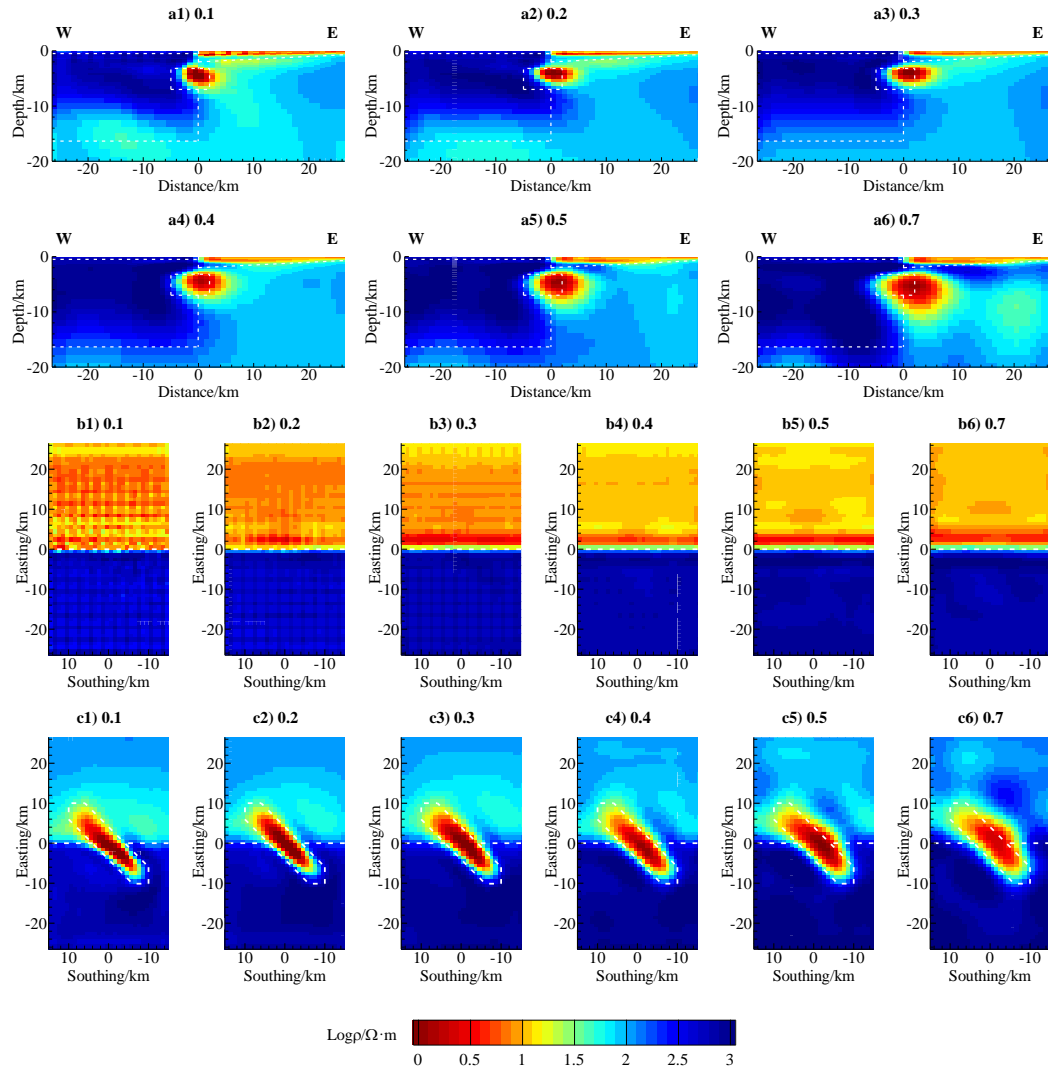

**Figure S2** Resistivity models obtained from inversion of  $Z$  and  $W$  responses with different model covariance smoothing parameters of 0.1, 0.2, 0.3, 0.4, 0.5, and 0.7, respectively. a1)–a6) illustrating the electrical resistivity model beneath a W–E profile ( $y=-1.5\text{km}$ ), the following Figures b1)–b6) and c1)–c6) representing the horizontal slices at 400 m depth and 4000 m depth, respectively.
